# Supplementary material for: A spatial Bayesian network model to assess the benefits of early warning for urban flood risk to people
Source: Copernicus journal article supplement (doi:10.5194/nhess-16-1323-2016), 2016-06-08
Supplement: Supplementary file 2 [file nhess-16-1323-2016-supplement.zip]

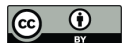

## *Supplement of*

# **A spatial Bayesian network model to assess the benefits of early warning for urban flood risk to people**

**Stefano Balbi et al.**

*Correspondence to:* Stefano Balbi (stefano.balbi@bc3research.org)

- nhess-16-1323-2016-supplement-title-page.pdf
- Flood\_Zurich\_BN
  - Hazard.net
  - RiskComprehensive.net
  - Vulnerability.net
- Questionnaire\_Flood\_Zurich.pdf

The copyright of individual parts of the supplement might differ from the CC-BY 3.0 licence.
